# Supplementary material
Source: publisher figshare collection journal article supplement (https://future-science-group.figshare.com/ndownloader/files/30700682)
Supplement: Supplementary file 1 [file 30700682]

## Sheet: proteins (quantitative result)
Table S2. Detailed proteins information detected in pooled serum from patients with syphilis by LC-MS/MS in this study.
Tp number	Protein IDs	Majority protein IDs	Fasta headers	Number of proteins	Peptides	Razor + unique peptides	Unique peptides	Sequence coverage [%]	Mol. weight [kDa]	LFQ intensity A_1	LFQ intensity A_2	LFQ intensity A_3	LFQ intensity AH_1	LFQ intensity AH_2	LFQ intensity AH_3	LFQ intensity B_1	LFQ intensity B_2	LFQ intensity B_3	LFQ intensity BH_1	LFQ intensity BH_2	LFQ intensity BH_3
Tp0030	sp|P23033|CH60_TREPA60kDachaperoninOS=Treponemapallidum(strainNichols)OX=243276GN=groLPE=1SV=4;sp|B2S1X8|CH60_TREPS60kDachaperoninOS=Treponemapallidumsubsp.pallidum(strainSS14)OX=455434GN=groLPE=3SV=1	sp|P23033|CH60_TREPA60kDachaperoninOS=Treponemapallidum(strainNichols)OX=243276GN=groLPE=1SV=4;sp|B2S1X8|CH60_TREPS60kDachaperoninOS=Treponemapallidumsubsp.pallidum(strainSS14)OX=455434GN=groLPE=3SV=1	sp|P23033|CH60_TREPA 60 kDa chaperonin OS=Treponema pallidum (strain Nichols) OX=243276 GN=groL PE=1 SV=4;sp|B2S1X8|CH60_TREPS 60 kDa chaperonin OS=Treponema pallidum subsp. pallidum (strain SS14) OX=455434 GN=groL PE=3 SV=1	2	1	1	1	1.7	57.98
Tp0116	sp|O83154|UVRB_TREPAUvrABCsystemproteinBOS=Treponemapallidum(strainNichols)OX=243276GN=uvrBPE=3SV=1;sp|B2S264|UVRB_TREPSUvrABCsystemproteinBOS=Treponemapallidumsubsp.pallidum(strainSS14)OX=455434GN=uvrBPE=3SV=1	sp|O83154|UVRB_TREPAUvrABCsystemproteinBOS=Treponemapallidum(strainNichols)OX=243276GN=uvrBPE=3SV=1;sp|B2S264|UVRB_TREPSUvrABCsystemproteinBOS=Treponemapallidumsubsp.pallidum(strainSS14)OX=455434GN=uvrBPE=3SV=1	sp|O83154|UVRB_TREPA UvrABC system protein B OS=Treponema pallidum (strain Nichols) OX=243276 GN=uvrB PE=3 SV=1;sp|B2S264|UVRB_TREPS UvrABC system protein B OS=Treponema pallidum subsp. pallidum (strain SS14) OX=455434 GN=uvrB PE=3 SV=1	2	2	2	2	3.3	76.189				568100000	322050000	112220000				418180000	362300000	372190000
Tp0216	sp|O83246|DNAK_TREPAChaperoneproteinDnaKOS=Treponemapallidum(strainNichols)OX=243276GN=dnaKPE=3SV=1;sp|B2S2G4|DNAK_TREPSChaperoneproteinDnaKOS=Treponemapallidumsubsp.pallidum(strainSS14)OX=455434GN=dnaKPE=3SV=1	sp|O83246|DNAK_TREPAChaperoneproteinDnaKOS=Treponemapallidum(strainNichols)OX=243276GN=dnaKPE=3SV=1;sp|B2S2G4|DNAK_TREPSChaperoneproteinDnaKOS=Treponemapallidumsubsp.pallidum(strainSS14)OX=455434GN=dnaKPE=3SV=1	sp|O83246|DNAK_TREPA Chaperone protein DnaK OS=Treponema pallidum (strain Nichols) OX=243276 GN=dnaK PE=3 SV=1;sp|B2S2G4|DNAK_TREPS Chaperone protein DnaK OS=Treponema pallidum subsp. pallidum (strain SS14) OX=455434 GN=dnaK PE=3 SV=1	2	2	2	2	4.3	68.041	21165000
Tp0242	sp|O83270|RPOC_TREPADNA-directedRNApolymerasesubunitbeta'OS=Treponemapallidum(strainNichols)OX=243276GN=rpoCPE=3SV=1;sp|B2S2I9|RPOC_TREPSDNA-directedRNApolymerasesubunitbeta'OS=Treponemapallidumsubsp.pallidum(strainSS14)OX=455434GN=rpoCPE=3SV=1	sp|O83270|RPOC_TREPADNA-directedRNApolymerasesubunitbeta'OS=Treponemapallidum(strainNichols)OX=243276GN=rpoCPE=3SV=1;sp|B2S2I9|RPOC_TREPSDNA-directedRNApolymerasesubunitbeta'OS=Treponemapallidumsubsp.pallidum(strainSS14)OX=455434GN=rpoCPE=3SV=1	sp|O83270|RPOC_TREPA DNA-directed RNA polymerase subunit beta OS=Treponema pallidum (strain Nichols) OX=243276 GN=rpoC PE=3 SV=1;sp|B2S2I9|RPOC_TREPS DNA-directed RNA polymerase subunit beta OS=Treponema pallidum subsp. pallidum (strain SS14) OX=455434 G	2	2	2	2	2.3	159.79								47580000
Tp0287	tr|O83311|O83311_TREPAUncharacterizedproteinOS=Treponemapallidum(strainNichols)OX=243276GN=TP_0287PE=4SV=1;tr|A0A0H3BK76|A0A0H3BK76_TREPSUncharacterizedproteinOS=Treponemapallidumsubsp.pallidum(strainSS14)OX=455434GN=TPASS_0287PE=4SV=1	tr|O83311|O83311_TREPAUncharacterizedproteinOS=Treponemapallidum(strainNichols)OX=243276GN=TP_0287PE=4SV=1;tr|A0A0H3BK76|A0A0H3BK76_TREPSUncharacterizedproteinOS=Treponemapallidumsubsp.pallidum(strainSS14)OX=455434GN=TPASS_0287PE=4SV=1	tr|O83311|O83311_TREPA Uncharacterized protein OS=Treponema pallidum (strain Nichols) OX=243276 GN=TP_0287 PE=4 SV=1;tr|A0A0H3BK76|A0A0H3BK76_TREPS Uncharacterized protein OS=Treponema pallidum subsp. pallidum (strain SS14) OX=455434 GN=TPASS_0287 PE=4 SV=	2	1	1	1	3.9	24.202					132550000	93926000					100140000	135410000
Tp0369	tr|A0A0H3BIQ1|A0A0H3BIQ1_TREPSYfiOdomain-containingproteinOS=Treponemapallidumsubsp.pallidum(strainSS14)OX=455434GN=TPASS_0369PE=4SV=1;sp|O83384|Y369_TREPAUncharacterizedproteinTP_0369OS=Treponemapallidum(strainNichols)OX=243276GN=TP_0369PE=3SV=1	tr|A0A0H3BIQ1|A0A0H3BIQ1_TREPSYfiOdomain-containingproteinOS=Treponemapallidumsubsp.pallidum(strainSS14)OX=455434GN=TPASS_0369PE=4SV=1;sp|O83384|Y369_TREPAUncharacterizedproteinTP_0369OS=Treponemapallidum(strainNichols)OX=243276GN=TP_0369PE=3SV=1	tr|A0A0H3BIQ1|A0A0H3BIQ1_TREPS YfiO domain-containing protein OS=Treponema pallidum subsp. pallidum (strain SS14) OX=455434 GN=TPASS_0369 PE=4 SV=1;sp|O83384|Y369_TREPA Uncharacterized protein TP_0369 OS=Treponema pallidum (strain Nichols) OX=243276 GN=TP_	2	1	1	1	4.1	55.859	537020000	4678100000	3775000000		3271400000	3214700000	5667000000	2479200000	4609800000	195840000	3611700000
Tp0426	tr|A0A0H3BKJ3|A0A0H3BKJ3_TREPSV-typeATPsynthasealphachainOS=Treponemapallidumsubsp.pallidum(strainSS14)OX=455434GN=atpA1PE=3SV=1;sp|O83441|VATA1_TREPAV-typeATPsynthasealphachain1OS=Treponemapallidum(strainNichols)OX=243276GN=atpA1PE=3SV=1	tr|A0A0H3BKJ3|A0A0H3BKJ3_TREPSV-typeATPsynthasealphachainOS=Treponemapallidumsubsp.pallidum(strainSS14)OX=455434GN=atpA1PE=3SV=1;sp|O83441|VATA1_TREPAV-typeATPsynthasealphachain1OS=Treponemapallidum(strainNichols)OX=243276GN=atpA1PE=3SV=1	tr|A0A0H3BKJ3|A0A0H3BKJ3_TREPS V-type ATP synthase alpha chain OS=Treponema pallidum subsp. pallidum (strain SS14) OX=455434 GN=atpA1 PE=3 SV=1;sp|O83441|VATA1_TREPA V-type ATP synthase alpha chain 1 OS=Treponema pallidum (strain Nichols) OX=243276 GN=atpA	2	3	3	3	8	65.018	4676300000	19170000000	6937700000	130100000	279520000		18273000000	13571000000	11636000000	203730000	388410000
Tp0494	tr|O83507|O83507_TREPAUncharacterizedproteinOS=Treponemapallidum(strainNichols)OX=243276GN=TP_0494PE=4SV=1;tr|A0A0H3BII0|A0A0H3BII0_TREPSzf-RING_7domain-containingproteinOS=Treponemapallidumsubsp.pallidum(strainSS14)OX=455434GN=TPASS_0494PE=4SV=1	tr|O83507|O83507_TREPAUncharacterizedproteinOS=Treponemapallidum(strainNichols)OX=243276GN=TP_0494PE=4SV=1;tr|A0A0H3BII0|A0A0H3BII0_TREPSzf-RING_7domain-containingproteinOS=Treponemapallidumsubsp.pallidum(strainSS14)OX=455434GN=TPASS_0494PE=4SV=1	tr|O83507|O83507_TREPA Uncharacterized protein OS=Treponema pallidum (strain Nichols) OX=243276 GN=TP_0494 PE=4 SV=1;tr|A0A0H3BII0|A0A0H3BII0_TREPS zf-RING_7 domain-containing protein OS=Treponema pallidum subsp. pallidum (strain SS14) OX=455434 GN=TPASS_0	2	1	1	1	4	31.433
Tp0524	tr|A0A0H3BKR6|A0A0H3BKR6_TREPSLonproteaseOS=Treponemapallidumsubsp.pallidum(strainSS14)OX=455434GN=lon2PE=2SV=1;sp|O83536|LON_TREPALonproteaseOS=Treponemapallidum(strainNichols)OX=243276GN=lonPE=3SV=1	tr|A0A0H3BKR6|A0A0H3BKR6_TREPSLonproteaseOS=Treponemapallidumsubsp.pallidum(strainSS14)OX=455434GN=lon2PE=2SV=1;sp|O83536|LON_TREPALonproteaseOS=Treponemapallidum(strainNichols)OX=243276GN=lonPE=3SV=1	tr|A0A0H3BKR6|A0A0H3BKR6_TREPS Lon protease OS=Treponema pallidum subsp. pallidum (strain SS14) OX=455434 GN=lon2 PE=2 SV=1;sp|O83536|LON_TREPA Lon protease OS=Treponema pallidum (strain Nichols) OX=243276 GN=lon PE=3 SV=1	2	1	1	1	0.9	97.727	628040000	100500000		150610000	59637000	306630000		86742000	47723000	78522000	121890000	144360000
Tp0542	tr|A0A0H3BJE2|A0A0H3BJE2_TREPSPyrophosphate--fructose6-phosphate1-phosphotransferaseOS=Treponemapallidumsubsp.pallidum(strainSS14)OX=455434GN=pfpPE=3SV=1;sp|O83553|PFP_TREPAPyrophosphate--fructose6-phosphate1-phosphotransferaseOS=Treponemapallidum(strainNichols)OX=243276GN=pfpPE=1SV=1	tr|A0A0H3BJE2|A0A0H3BJE2_TREPSPyrophosphate--fructose6-phosphate1-phosphotransferaseOS=Treponemapallidumsubsp.pallidum(strainSS14)OX=455434GN=pfpPE=3SV=1;sp|O83553|PFP_TREPAPyrophosphate--fructose6-phosphate1-phosphotransferaseOS=Treponemapallidum(strainNichols)OX=243276GN=pfpPE=1SV=1	tr|A0A0H3BJE2|A0A0H3BJE2_TREPS Pyrophosphate--fructose 6-phosphate 1-phosphotransferase OS=Treponema pallidum subsp. pallidum (strain SS14) OX=455434 GN=pfp PE=3 SV=1;sp|O83553|PFP_TREPA Pyrophosphate--fructose 6-phosphate 1-phosphotransferase OS=Treponema	2	1	1	1	2.6	62.426		29853000	38183000	219820000	101780000	286450000				184820000	107970000	207650000
Tp0648	tr|O83654|O83654_TREPAUncharacterizedproteinOS=Treponemapallidum(strainNichols)OX=243276GN=TP_0648PE=4SV=1;tr|A0A0H3BKY3|A0A0H3BKY3_TREPSUncharacterizedproteinOS=Treponemapallidumsubsp.pallidum(strainSS14)OX=455434GN=TPASS_0648PE=4SV=1	tr|O83654|O83654_TREPAUncharacterizedproteinOS=Treponemapallidum(strainNichols)OX=243276GN=TP_0648PE=4SV=1;tr|A0A0H3BKY3|A0A0H3BKY3_TREPSUncharacterizedproteinOS=Treponemapallidumsubsp.pallidum(strainSS14)OX=455434GN=TPASS_0648PE=4SV=1	tr|O83654|O83654_TREPA Uncharacterized protein OS=Treponema pallidum (strain Nichols) OX=243276 GN=TP_0648 PE=4 SV=1;tr|A0A0H3BKY3|A0A0H3BKY3_TREPS Uncharacterized protein OS=Treponema pallidum subsp. pallidum (strain SS14) OX=455434 GN=TPASS_0648 PE=4 SV=	2	3	3	3	5.3	77.634					25038000	272580000
Tp0651	tr|O83657|O83657_TREPAConservedhypotheticalintegralmembraneproteinOS=Treponemapallidum(strainNichols)OX=243276GN=TP_0651PE=4SV=1;tr|A0A0H3BJC4|A0A0H3BJC4_TREPSHypotheticalintegralmembraneproteinOS=Treponemapallidumsubsp.pallidum(strainSS14)OX=455434GN=TPASS_0651PE=4SV=1	tr|O83657|O83657_TREPAConservedhypotheticalintegralmembraneproteinOS=Treponemapallidum(strainNichols)OX=243276GN=TP_0651PE=4SV=1;tr|A0A0H3BJC4|A0A0H3BJC4_TREPSHypotheticalintegralmembraneproteinOS=Treponemapallidumsubsp.pallidum(strainSS14)OX=455434GN=TPASS_0651PE=4SV=1	tr|O83657|O83657_TREPA Conserved hypothetical integral membrane protein OS=Treponema pallidum (strain Nichols) OX=243276 GN=TP_0651 PE=4 SV=1;tr|A0A0H3BJC4|A0A0H3BJC4_TREPS Hypothetical integral membrane protein OS=Treponema pallidum subsp. pallidum (strai	2	1	1	1	0.9	88.245									3398400000
Tp0837	sp|O83809|SYT_TREPAThreonine--tRNAligaseOS=Treponemapallidum(strainNichols)OX=243276GN=thrSPE=3SV=1;sp|B2S475|SYT_TREPSThreonine--tRNAligaseOS=Treponemapallidumsubsp.pallidum(strainSS14)OX=455434GN=thrSPE=3SV=1	sp|O83809|SYT_TREPAThreonine--tRNAligaseOS=Treponemapallidum(strainNichols)OX=243276GN=thrSPE=3SV=1;sp|B2S475|SYT_TREPSThreonine--tRNAligaseOS=Treponemapallidumsubsp.pallidum(strainSS14)OX=455434GN=thrSPE=3SV=1	sp|O83809|SYT_TREPA Threonine--tRNA ligase OS=Treponema pallidum (strain Nichols) OX=243276 GN=thrS PE=3 SV=1;sp|B2S475|SYT_TREPS Threonine--tRNA ligase OS=Treponema pallidum subsp. pallidum (strain SS14) OX=455434 GN=thrS PE=3 SV=1	2	2	2	2	3.5	67.398
Tp0927	tr|A0A0H3BLL3|A0A0H3BLL3_TREPSUncharacterizedproteinOS=Treponemapallidumsubsp.pallidum(strainSS14)OX=455434GN=TPASS_0927PE=4SV=1;sp|O83897|Y927_TREPAUncharacterizedproteinTP_0927OS=Treponemapallidum(strainNichols)OX=243276GN=TP_0927PE=4SV=1	tr|A0A0H3BLL3|A0A0H3BLL3_TREPSUncharacterizedproteinOS=Treponemapallidumsubsp.pallidum(strainSS14)OX=455434GN=TPASS_0927PE=4SV=1;sp|O83897|Y927_TREPAUncharacterizedproteinTP_0927OS=Treponemapallidum(strainNichols)OX=243276GN=TP_0927PE=4SV=1	tr|A0A0H3BLL3|A0A0H3BLL3_TREPS Uncharacterized protein OS=Treponema pallidum subsp. pallidum (strain SS14) OX=455434 GN=TPASS_0927 PE=4 SV=1;sp|O83897|Y927_TREPA Uncharacterized protein TP_0927 OS=Treponema pallidum (strain Nichols) OX=243276 GN=TP_0927 PE	2	2	2	2	9.2	22.215	17831000000	23695000000	32772000000		215230000	422580000	20059000000	22679000000	31776000000	183290000	264080000	223200000
Tp0984	tr|A0A0H3BKH1|A0A0H3BKH1_TREPSChaperoneproteinHtpGOS=Treponemapallidumsubsp.pallidum(strainSS14)OX=455434GN=htpGPE=3SV=1;sp|O83949|HTPG_TREPAChaperoneproteinHtpGOS=Treponemapallidum(strainNichols)OX=243276GN=htpGPE=3SV=1	tr|A0A0H3BKH1|A0A0H3BKH1_TREPSChaperoneproteinHtpGOS=Treponemapallidumsubsp.pallidum(strainSS14)OX=455434GN=htpGPE=3SV=1;sp|O83949|HTPG_TREPAChaperoneproteinHtpGOS=Treponemapallidum(strainNichols)OX=243276GN=htpGPE=3SV=1	tr|A0A0H3BKH1|A0A0H3BKH1_TREPS Chaperone protein HtpG OS=Treponema pallidum subsp. pallidum (strain SS14) OX=455434 GN=htpG PE=3 SV=1;sp|O83949|HTPG_TREPA Chaperone protein HtpG OS=Treponema pallidum (strain Nichols) OX=243276 GN=htpG PE=3 SV=1	2	2	2	2	5.2	72.937	222090000	667460000	348030000				149350000	253380000	235610000

## Sheet: peptides
Table S2. Detailed peptides information detected in pooled serum from patients with syphilis by LC-MS/MS in this study.
Sequence	Length	Missed cleavages	Mass	Proteins	Leading razor protein	Unique (Groups)	Charges	Intensity A_1	Intensity A_2	Intensity A_3	Intensity AH_1	Intensity AH_2	Intensity AH_3	Intensity B_1	Intensity B_2	Intensity B_3	Intensity BH_1	Intensity BH_2	Intensity BH_3
AAAHTGAPVRQDQTDTAVAEK	21	1	2136.06	tr|A0A0H3BIQ1|A0A0H3BIQ1_TREPSYfiOdomain-containingproteinOS=Treponemapallidumsubsp.pallidum(strainSS14)OX=455434GN=TPASS_0369PE=4SV=1;sp|O83384|Y369_TREPAUncharacterizedproteinTP_0369OS=Treponemapallidum(strainNichols)OX=243276GN=TP_0369PE=3SV=1	tr|A0A0H3BIQ1|A0A0H3BIQ1_TREPSYfiOdomain-containingproteinOS=Treponemapallidumsubsp.pallidum(strainSS14)OX=455434GN=TPASS_0369PE=4SV=1	yes	2	1531100000	6596800000	4870700000	0	1745000000	1605500000	4919400000	1719200000	3544500000	267780000	2225900000	0
AGEVVETLR	9	0	972.524	tr|A0A0H3BKJ3|A0A0H3BKJ3_TREPSV-typeATPsynthasealphachainOS=Treponemapallidumsubsp.pallidum(strainSS14)OX=455434GN=atpA1PE=3SV=1;sp|O83441|VATA1_TREPAV-typeATPsynthasealphachain1OS=Treponemapallidum(strainNichols)OX=243276GN=atpA1PE=3SV=1	tr|A0A0H3BKJ3|A0A0H3BKJ3_TREPSV-typeATPsynthasealphachainOS=Treponemapallidumsubsp.pallidum(strainSS14)OX=455434GN=atpA1PE=3SV=1	yes	2	5386900000	4385600000	577880000	0	0	0	602220000	429840000	0	0	0	0
AYFSKLGHMFIDYNCCAWNSEAFVEKEK	28	2	3443.54	tr|A0A0H3BKJ3|A0A0H3BKJ3_TREPSV-typeATPsynthasealphachainOS=Treponemapallidumsubsp.pallidum(strainSS14)OX=455434GN=atpA1PE=3SV=1;sp|O83441|VATA1_TREPAV-typeATPsynthasealphachain1OS=Treponemapallidum(strainNichols)OX=243276GN=atpA1PE=3SV=1	tr|A0A0H3BKJ3|A0A0H3BKJ3_TREPSV-typeATPsynthasealphachainOS=Treponemapallidumsubsp.pallidum(strainSS14)OX=455434GN=atpA1PE=3SV=1	yes	7	0	0	46305000	0	0	0	0	0	0	0	0	0
DVLFKFERIIK	11	2	1406.83	tr|O83507|O83507_TREPAUncharacterizedproteinOS=Treponemapallidum(strainNichols)OX=243276GN=TP_0494PE=4SV=1;tr|A0A0H3BII0|A0A0H3BII0_TREPSzf-RING_7domain-containingproteinOS=Treponemapallidumsubsp.pallidum(strainSS14)OX=455434GN=TPASS_0494PE=4SV=1	tr|O83507|O83507_TREPAUncharacterizedproteinOS=Treponemapallidum(strainNichols)OX=243276GN=TP_0494PE=4SV=1	yes	2	0	0	0	0	0	0	0	0	0	0	0	0
ELISNASDALDK	12	0	1274.64	tr|A0A0H3BKH1|A0A0H3BKH1_TREPSChaperoneproteinHtpGOS=Treponemapallidumsubsp.pallidum(strainSS14)OX=455434GN=htpGPE=3SV=1;sp|O83949|HTPG_TREPAChaperoneproteinHtpGOS=Treponemapallidum(strainNichols)OX=243276GN=htpGPE=3SV=1	tr|A0A0H3BKH1|A0A0H3BKH1_TREPSChaperoneproteinHtpGOS=Treponemapallidumsubsp.pallidum(strainSS14)OX=455434GN=htpGPE=3SV=1	yes	2	242430000	0	0	0	0	0	0	157420000	0	0	0	0
ETLYPVSGR	9	0	1020.52	tr|A0A0H3BLL3|A0A0H3BLL3_TREPSUncharacterizedproteinOS=Treponemapallidumsubsp.pallidum(strainSS14)OX=455434GN=TPASS_0927PE=4SV=1;sp|O83897|Y927_TREPAUncharacterizedproteinTP_0927OS=Treponemapallidum(strainNichols)OX=243276GN=TP_0927PE=4SV=1	tr|A0A0H3BLL3|A0A0H3BLL3_TREPSUncharacterizedproteinOS=Treponemapallidumsubsp.pallidum(strainSS14)OX=455434GN=TPASS_0927PE=4SV=1	yes	1;2	20675000000	23651000000	27776000000	67518000	236400000	132620000	20502000000	27034000000	30544000000	142790000	219250000	202050000
FATSDLNDLYR	11	0	1313.63	sp|O83270|RPOC_TREPADNA-directedRNApolymerasesubunitbeta'OS=Treponemapallidum(strainNichols)OX=243276GN=rpoCPE=3SV=1;sp|B2S2I9|RPOC_TREPSDNA-directedRNApolymerasesubunitbeta'OS=Treponemapallidumsubsp.pallidum(strainSS14)OX=455434GN=rpoCPE=3SV=1	sp|O83270|RPOC_TREPADNA-directedRNApolymerasesubunitbeta'OS=Treponemapallidum(strainNichols)OX=243276GN=rpoCPE=3SV=1	yes	2	0	0	0	0	0	0	0	0	0	0	0	0
GKGKSMK	7	2	734.411	tr|O83654|O83654_TREPAUncharacterizedproteinOS=Treponemapallidum(strainNichols)OX=243276GN=TP_0648PE=4SV=1;tr|A0A0H3BKY3|A0A0H3BKY3_TREPSUncharacterizedproteinOS=Treponemapallidumsubsp.pallidum(strainSS14)OX=455434GN=TPASS_0648PE=4SV=1	tr|O83654|O83654_TREPAUncharacterizedproteinOS=Treponemapallidum(strainNichols)OX=243276GN=TP_0648PE=4SV=1	yes	1	0	92319000	60225000	0	0	0	368500000	86654000	108670000	0	0	0
GLCVEENITMLQKRSDTLDR	20	2	2377.17	sp|O83809|SYT_TREPAThreonine--tRNAligaseOS=Treponemapallidum(strainNichols)OX=243276GN=thrSPE=3SV=1;sp|B2S475|SYT_TREPSThreonine--tRNAligaseOS=Treponemapallidumsubsp.pallidum(strainSS14)OX=455434GN=thrSPE=3SV=1	sp|O83809|SYT_TREPAThreonine--tRNAligaseOS=Treponemapallidum(strainNichols)OX=243276GN=thrSPE=3SV=1	yes	3	0	0	0	0	0	0	0	0	0	0	0	0
HLVSMSRQLLVRDGDTVEAGER	22	2	2467.26	sp|O83270|RPOC_TREPADNA-directedRNApolymerasesubunitbeta'OS=Treponemapallidum(strainNichols)OX=243276GN=rpoCPE=3SV=1;sp|B2S2I9|RPOC_TREPSDNA-directedRNApolymerasesubunitbeta'OS=Treponemapallidumsubsp.pallidum(strainSS14)OX=455434GN=rpoCPE=3SV=1	sp|O83270|RPOC_TREPADNA-directedRNApolymerasesubunitbeta'OS=Treponemapallidum(strainNichols)OX=243276GN=rpoCPE=3SV=1	yes	2	0	0	0	0	0	0	0	66158000	0	0	0	0
ICRDRDGYK	9	2	1181.56	tr|A0A0H3BLL3|A0A0H3BLL3_TREPSUncharacterizedproteinOS=Treponemapallidumsubsp.pallidum(strainSS14)OX=455434GN=TPASS_0927PE=4SV=1;sp|O83897|Y927_TREPAUncharacterizedproteinTP_0927OS=Treponemapallidum(strainNichols)OX=243276GN=TP_0927PE=4SV=1	tr|A0A0H3BLL3|A0A0H3BLL3_TREPSUncharacterizedproteinOS=Treponemapallidumsubsp.pallidum(strainSS14)OX=455434GN=TPASS_0927PE=4SV=1	yes	3	0	0	0	1767300000	2659800000	2021900000	0	0	0	2986100000	1992700000	2143800000
IDEILLVGGSTR	12	0	1271.71	sp|O83246|DNAK_TREPAChaperoneproteinDnaKOS=Treponemapallidum(strainNichols)OX=243276GN=dnaKPE=3SV=1;sp|B2S2G4|DNAK_TREPSChaperoneproteinDnaKOS=Treponemapallidumsubsp.pallidum(strainSS14)OX=455434GN=dnaKPE=3SV=1	sp|O83246|DNAK_TREPAChaperoneproteinDnaKOS=Treponemapallidum(strainNichols)OX=243276GN=dnaKPE=3SV=1	yes	2	21165000	0	0	0	0	0	0	0	0	0	0	0
IDSEAEGIIR	10	0	1101.57	tr|A0A0H3BKJ3|A0A0H3BKJ3_TREPSV-typeATPsynthasealphachainOS=Treponemapallidumsubsp.pallidum(strainSS14)OX=455434GN=atpA1PE=3SV=1;sp|O83441|VATA1_TREPAV-typeATPsynthasealphachain1OS=Treponemapallidum(strainNichols)OX=243276GN=atpA1PE=3SV=1	tr|A0A0H3BKJ3|A0A0H3BKJ3_TREPSV-typeATPsynthasealphachainOS=Treponemapallidumsubsp.pallidum(strainSS14)OX=455434GN=atpA1PE=3SV=1	yes	2	3568300000	15448000000	5881900000	72359000	130210000	0	13888000000	11788000000	12616000000	125560000	210180000	0
LSATFSLMERR	11	1	1309.68	sp|O83154|UVRB_TREPAUvrABCsystemproteinBOS=Treponemapallidum(strainNichols)OX=243276GN=uvrBPE=3SV=1;sp|B2S264|UVRB_TREPSUvrABCsystemproteinBOS=Treponemapallidumsubsp.pallidum(strainSS14)OX=455434GN=uvrBPE=3SV=1	sp|O83154|UVRB_TREPAUvrABCsystemproteinBOS=Treponemapallidum(strainNichols)OX=243276GN=uvrBPE=3SV=1	yes	3	0	0	0	0	0	0	0	0	0	0	0	0
LSATVIR	7	0	758.465	tr|O83657|O83657_TREPAConservedhypotheticalintegralmembraneproteinOS=Treponemapallidum(strainNichols)OX=243276GN=TP_0651PE=4SV=1;tr|A0A0H3BJC4|A0A0H3BJC4_TREPSHypotheticalintegralmembraneproteinOS=Treponemapallidumsubsp.pallidum(strainSS14)OX=455434GN=TPASS_0651PE=4SV=1	tr|O83657|O83657_TREPAConservedhypotheticalintegralmembraneproteinOS=Treponemapallidum(strainNichols)OX=243276GN=TP_0651PE=4SV=1	yes	1	181940000	1978800000	2341700000	0	0	0	2979600000	3098000000	3039200000	0	0	0
LSDSVSCIVIDENDPTVQMER	21	0	2406.1	tr|A0A0H3BKH1|A0A0H3BKH1_TREPSChaperoneproteinHtpGOS=Treponemapallidumsubsp.pallidum(strainSS14)OX=455434GN=htpGPE=3SV=1;sp|O83949|HTPG_TREPAChaperoneproteinHtpGOS=Treponemapallidum(strainNichols)OX=243276GN=htpGPE=3SV=1	tr|A0A0H3BKH1|A0A0H3BKH1_TREPSChaperoneproteinHtpGOS=Treponemapallidumsubsp.pallidum(strainSS14)OX=455434GN=htpGPE=3SV=1	yes	3	171030000	520550000	309690000	0	0	0	193980000	0	244340000	0	0	0
MGLCVEENITMLQK	14	0	1664.79	sp|O83809|SYT_TREPAThreonine--tRNAligaseOS=Treponemapallidum(strainNichols)OX=243276GN=thrSPE=3SV=1;sp|B2S475|SYT_TREPSThreonine--tRNAligaseOS=Treponemapallidumsubsp.pallidum(strainSS14)OX=455434GN=thrSPE=3SV=1	sp|O83809|SYT_TREPAThreonine--tRNAligaseOS=Treponemapallidum(strainNichols)OX=243276GN=thrSPE=3SV=1	yes	2	0	0	0	0	0	0	0	0	0	0	0	0
NERSLVLTLTK	11	1	1272.74	sp|O83154|UVRB_TREPAUvrABCsystemproteinBOS=Treponemapallidum(strainNichols)OX=243276GN=uvrBPE=3SV=1;sp|B2S264|UVRB_TREPSUvrABCsystemproteinBOS=Treponemapallidumsubsp.pallidum(strainSS14)OX=455434GN=uvrBPE=3SV=1	sp|O83154|UVRB_TREPAUvrABCsystemproteinBOS=Treponemapallidum(strainNichols)OX=243276GN=uvrBPE=3SV=1	yes	2	0	0	0	433410000	250450000	82427000	0	0	0	353520000	309830000	355460000
NLAPLLEK	8	0	896.533	tr|O83311|O83311_TREPAUncharacterizedproteinOS=Treponemapallidum(strainNichols)OX=243276GN=TP_0287PE=4SV=1;tr|A0A0H3BK76|A0A0H3BK76_TREPSUncharacterizedproteinOS=Treponemapallidumsubsp.pallidum(strainSS14)OX=455434GN=TPASS_0287PE=4SV=1	tr|O83311|O83311_TREPAUncharacterizedproteinOS=Treponemapallidum(strainNichols)OX=243276GN=TP_0287PE=4SV=1	yes	2	0	0	0	0	103090000	68991000	0	0	0	0	85635000	129320000
NQREYFLR	8	1	1124.57	tr|A0A0H3BKR6|A0A0H3BKR6_TREPSLonproteaseOS=Treponemapallidumsubsp.pallidum(strainSS14)OX=455434GN=lon2PE=2SV=1;sp|O83536|LON_TREPALonproteaseOS=Treponemapallidum(strainNichols)OX=243276GN=lonPE=3SV=1	tr|A0A0H3BKR6|A0A0H3BKR6_TREPSLonproteaseOS=Treponemapallidumsubsp.pallidum(strainSS14)OX=455434GN=lon2PE=2SV=1	yes	2	751120000	78427000	0	91879000	53495000	215120000	0	116200000	51984000	76566000	79055000	109080000
RHQSEAVIDLGTQDAELQGK	20	1	2194.1	tr|O83654|O83654_TREPAUncharacterizedproteinOS=Treponemapallidum(strainNichols)OX=243276GN=TP_0648PE=4SV=1;tr|A0A0H3BKY3|A0A0H3BKY3_TREPSUncharacterizedproteinOS=Treponemapallidumsubsp.pallidum(strainSS14)OX=455434GN=TPASS_0648PE=4SV=1	tr|O83654|O83654_TREPAUncharacterizedproteinOS=Treponemapallidum(strainNichols)OX=243276GN=TP_0648PE=4SV=1	yes	3	0	0	0	0	0	0	0	0	0	0	0	0
SEFEKMTDDLFERTK	15	2	1874.87	sp|O83246|DNAK_TREPAChaperoneproteinDnaKOS=Treponemapallidum(strainNichols)OX=243276GN=dnaKPE=3SV=1;sp|B2S2G4|DNAK_TREPSChaperoneproteinDnaKOS=Treponemapallidumsubsp.pallidum(strainSS14)OX=455434GN=dnaKPE=3SV=1	sp|O83246|DNAK_TREPAChaperoneproteinDnaKOS=Treponemapallidum(strainNichols)OX=243276GN=dnaKPE=3SV=1	yes	2	0	0	0	0	0	0	0	0	0	0	0	0
SISLLQQERHRYLPK	15	2	1867.04	tr|A0A0H3BJE2|A0A0H3BJE2_TREPSPyrophosphate--fructose6-phosphate1-phosphotransferaseOS=Treponemapallidumsubsp.pallidum(strainSS14)OX=455434GN=pfpPE=3SV=1;sp|O83553|PFP_TREPAPyrophosphate--fructose6-phosphate1-phosphotransferaseOS=Treponemapallidum(strainNichols)OX=243276GN=pfpPE=1SV=1	tr|A0A0H3BJE2|A0A0H3BJE2_TREPSPyrophosphate--fructose6-phosphate1-phosphotransferaseOS=Treponemapallidumsubsp.pallidum(strainSS14)OX=455434GN=pfpPE=3SV=1	yes	2	0	33096000	42774000	151020000	110430000	189470000	0	0	0	140690000	130730000	178580000
SLFEEILAR	9	0	1076.59	tr|O83654|O83654_TREPAUncharacterizedproteinOS=Treponemapallidum(strainNichols)OX=243276GN=TP_0648PE=4SV=1;tr|A0A0H3BKY3|A0A0H3BKY3_TREPSUncharacterizedproteinOS=Treponemapallidumsubsp.pallidum(strainSS14)OX=455434GN=TPASS_0648PE=4SV=1	tr|O83654|O83654_TREPAUncharacterizedproteinOS=Treponemapallidum(strainNichols)OX=243276GN=TP_0648PE=4SV=1	yes	2	0	0	0	0	19472000	200210000	0	0	0	0	0	0
VEDALNATR	9	0	987.499	sp|P23033|CH60_TREPA60kDachaperoninOS=Treponemapallidum(strainNichols)OX=243276GN=groLPE=1SV=4;sp|B2S1X8|CH60_TREPS60kDachaperoninOS=Treponemapallidumsubsp.pallidum(strainSS14)OX=455434GN=groLPE=3SV=1	sp|P23033|CH60_TREPA60kDachaperoninOS=Treponemapallidum(strainNichols)OX=243276GN=groLPE=1SV=4	yes	2	0	0	0	0	0	0	0	0	0	0	0	0
